# Supplementary figures and images for: Maleate–fumarate conversion and other novel aspects of the reaction of a Co(ii) maleate with pyridine and bipyridine
Source: Royal Society of Chemistry journal article supplement (doi:10.1039/b718623a), 2008-01-01

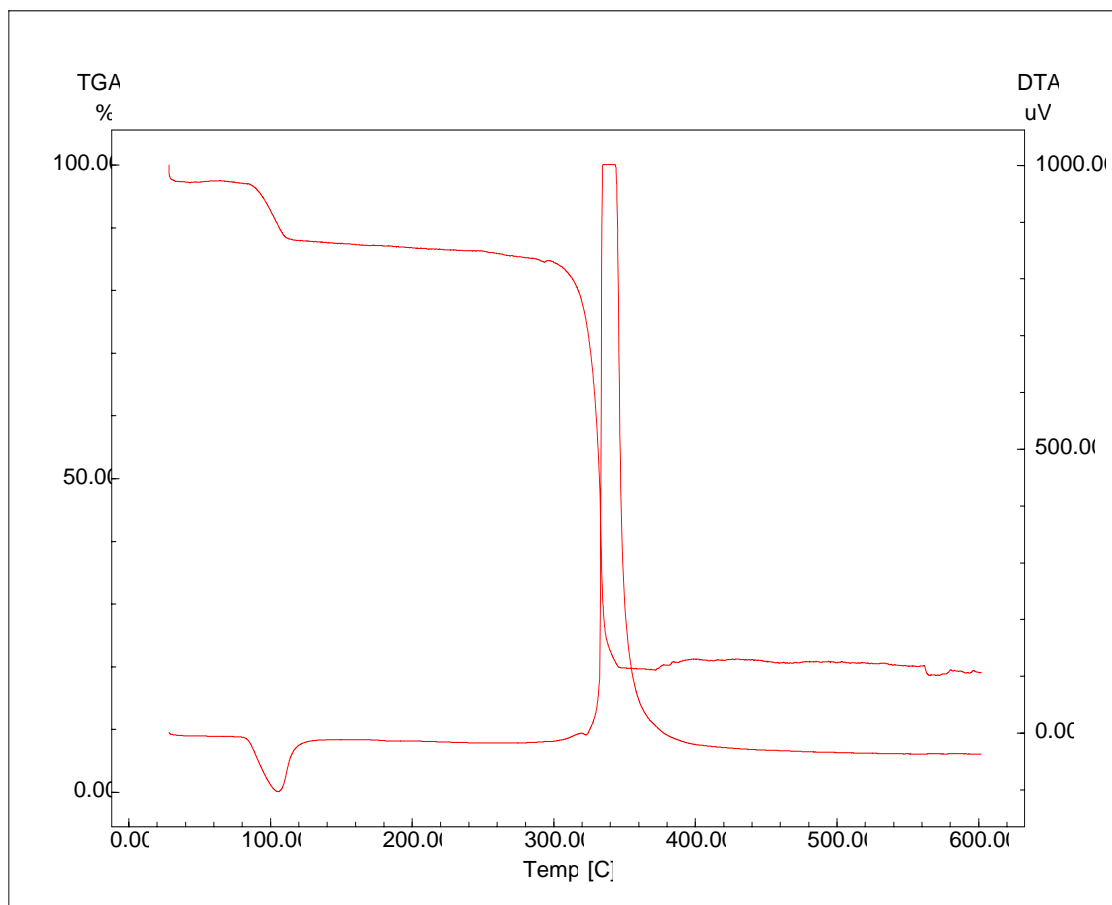

**Fig(Suppl)** Thermogram of compound **5**

Supplement: b718623a.pdf [file b718623a.pdf]
